# Supplementary material
Source: publisher figshare collection journal article supplement (https://acs.figshare.com/ndownloader/files/28935229)
Supplement: Supplementary file 1 [file 28935229]

# Arsenic(III)-Oxide Intercalates with Potassium Chloride: Water-Induced Varieties and New Synthesis Methods

## Supporting Information

*Mateusz A. Domański<sup>1†</sup>, Karol Kraszewski<sup>1†</sup>, Piotr Paluch<sup>2</sup> and Piotr A. Guńka<sup>1\*</sup>*

<sup>1</sup> Faculty of Chemistry, Warsaw University of Technology, Noakowskiego 3, 00-664 Warszawa, Poland.

<sup>2</sup> Centre of Molecular and Macromolecular Studies, Polish Academy of Sciences, Sienkiewicza 112, 90-363 Łódź, Poland

† Present Addresses: Centre of New Technologies, University of Warsaw, S. Banacha 2c, 02-097 Warszawa, Poland.

\* To whom correspondence should be addressed. E-mail: [piogun@ch.pw.edu.pl](mailto:piogun@ch.pw.edu.pl)

**Table S1.** Qualitative description of mechanochemical studies results.

| reactants<br>(molar ratio)                          | arsenolite + KCl (1:1)                               | arsenolite + KCl (1:2)                            | claudetite II+ KCl<br>(1:1)                                                                 |
|-----------------------------------------------------|------------------------------------------------------|---------------------------------------------------|---------------------------------------------------------------------------------------------|
| no solution                                         | no reaction                                          | no reaction                                       | no reaction                                                                                 |
| distilled water                                     | no reaction                                          | no reaction                                       | intercalate <b>X<sub>KCl</sub></b> , low yield, pronounced effect of time on reaction yield |
| CH <sub>3</sub> COOK<br>aqueous solution            | intercalate <b>P<sub>KCl</sub></b> ,<br>medium yield | intercalate <b>P<sub>KCl</sub></b> , low<br>yield | intercalate <b>P<sub>KCl</sub></b> , high<br>conversion of<br>claudetite II                 |
| K <sub>2</sub> HPO <sub>4</sub><br>aqueous solution | intercalate <b>X<sub>KCl</sub></b> ,<br>medium yield | intercalate <b>X<sub>KCl</sub></b> , low<br>yield | intercalate <b>P<sub>KCl</sub></b> , high<br>conversion of<br>claudetite II                 |

**Table S2.** Qualitative description of the stability of the mechanochemical reaction products in the ambient conditions (or during drying)

| reactants<br>(molar ratio)                          | arsenolite + KCl (1:1)                                                                                                  | arsenolite + KCl (1:2)                                                                                             | claudetite II+ KCl<br>(1:1)                                                                                                       |
|-----------------------------------------------------|-------------------------------------------------------------------------------------------------------------------------|--------------------------------------------------------------------------------------------------------------------|-----------------------------------------------------------------------------------------------------------------------------------|
| distilled water                                     | no products                                                                                                             | no products                                                                                                        | the product<br>decomposed to<br>claudetite II,<br>arsenolite and KCl                                                              |
| CH <sub>3</sub> COOK<br>aqueous solution            | intercalate <b>P<sub>KCl</sub></b> ,<br>medium yield                                                                    | intercalate <b>P<sub>KCl</sub></b> , low<br>yield                                                                  | further reaction, large<br>quantity of <b>Y<sub>KCl</sub></b><br>intercalate plus<br>remaining compound<br><b>P<sub>KCl</sub></b> |
| K <sub>2</sub> HPO <sub>4</sub><br>aqueous solution | intercalate <b>X<sub>KCl</sub></b><br>decomposed to<br>intercalate <b>Y<sub>KCl</sub></b><br>completely after 5<br>days | after drying at 40 °C<br>for 3 h the product<br>formed unknown<br>phase <b>Z<sub>KCl</sub></b> which was<br>stable | after drying at 80 °C<br>for 1 h the product<br>formed unknown<br>phase <b>Z<sub>KCl</sub></b> which was<br>stable                |

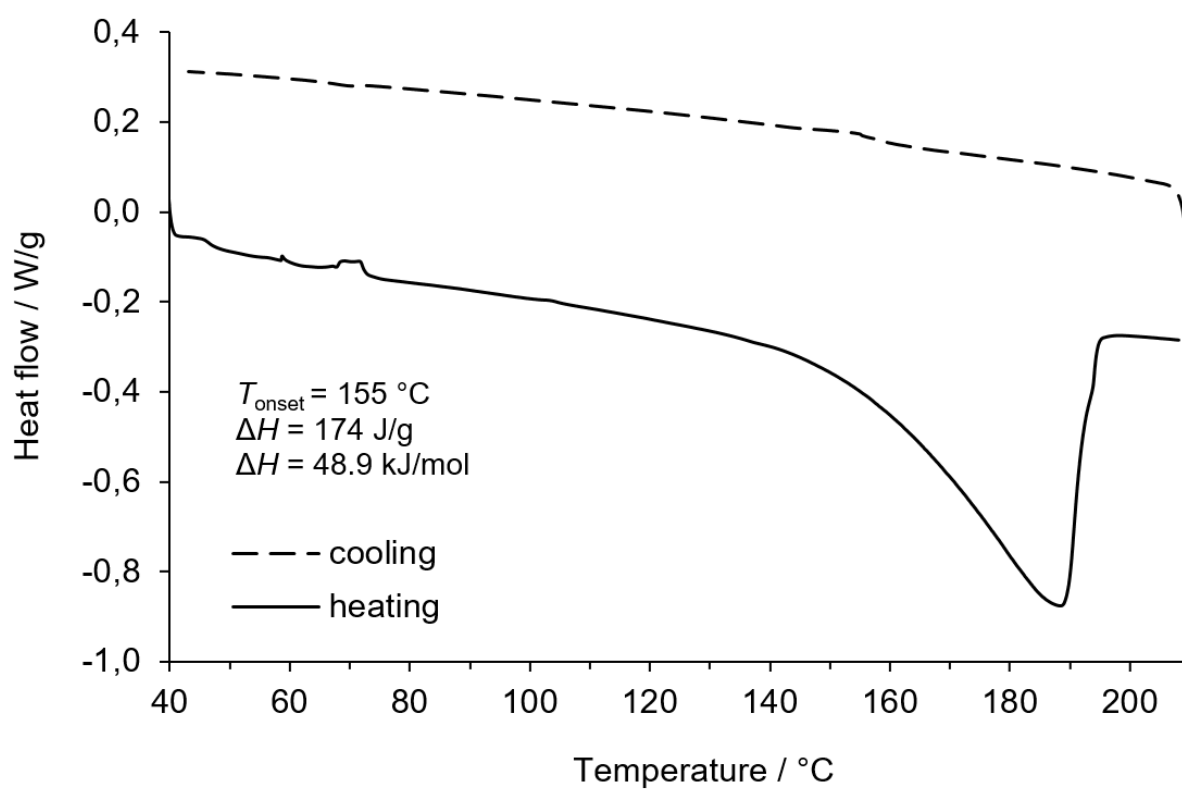

**Figure S1.** Differential scanning calorimetry (DSC) curve for intercalate YKCl. DSC experiment was carried out from 40 °C to 210 °C with a heating rate of 5 °C/min and cooling rate of 10 °C/min.

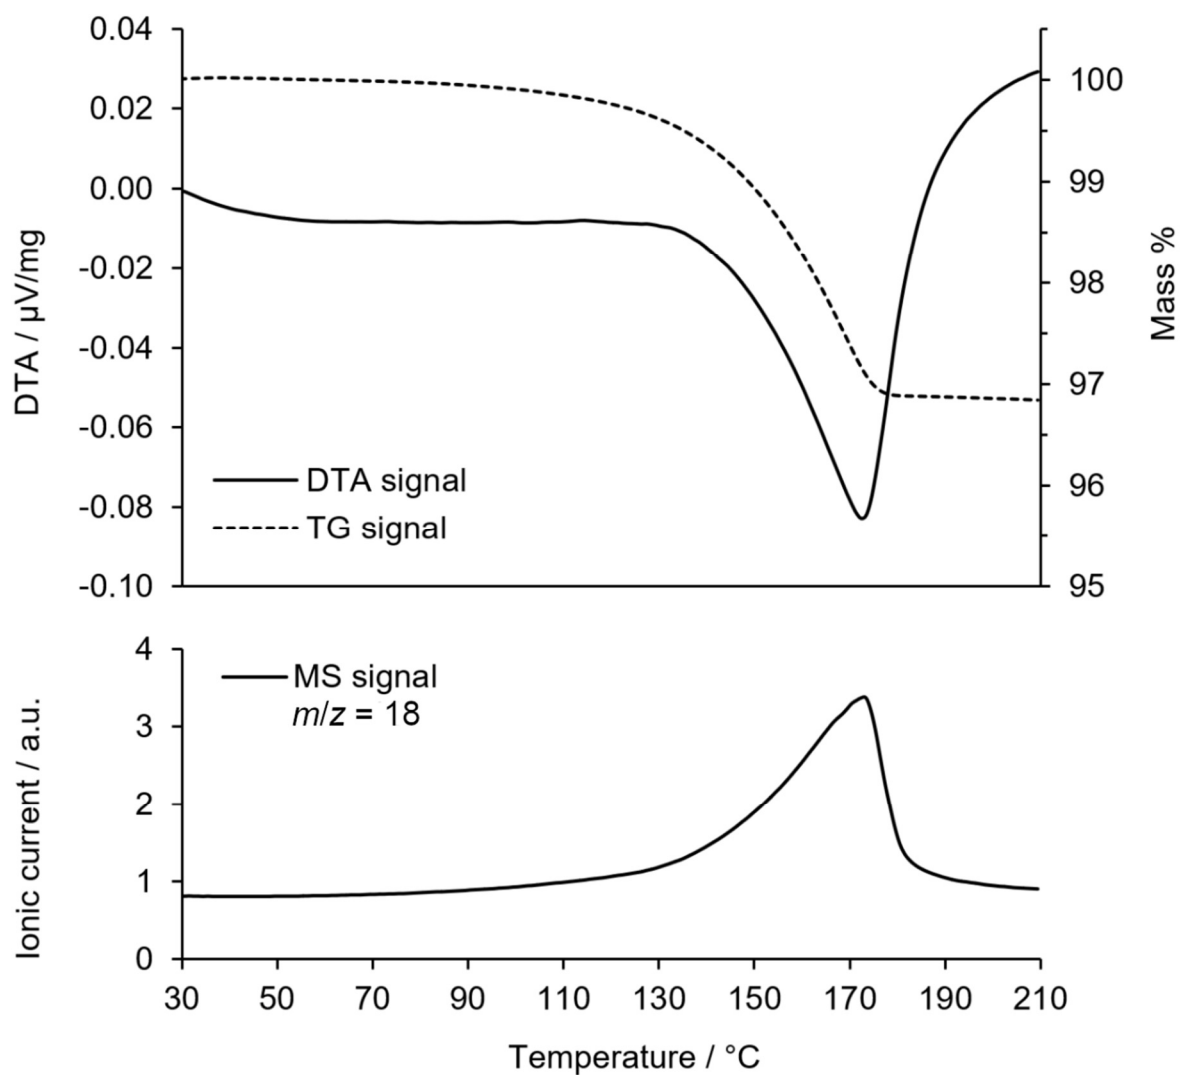

**Figure S2.** Differential thermal analysis and thermogravimetric curve for intercalate  $\text{YKCl}$  (top) together with the mass spectrometry signal of  $m/z = 18$  corresponding to water (bottom) plotted as a function of temperature.

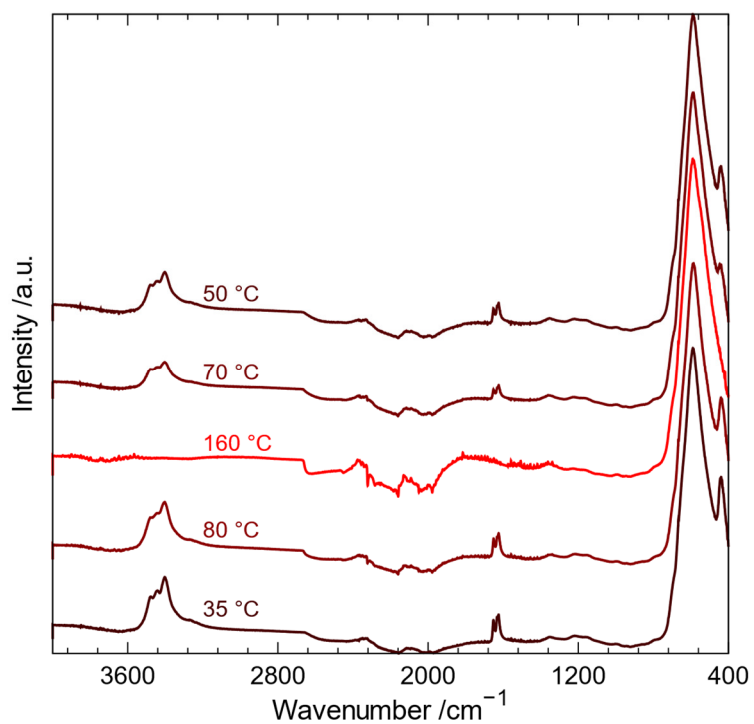

**Figure S3.** ATR-FTIR spectra of intercalate  $\text{Y}_{\text{KCl}}$  recorded at various temperatures as indicated by labels plotted next to the spectra.

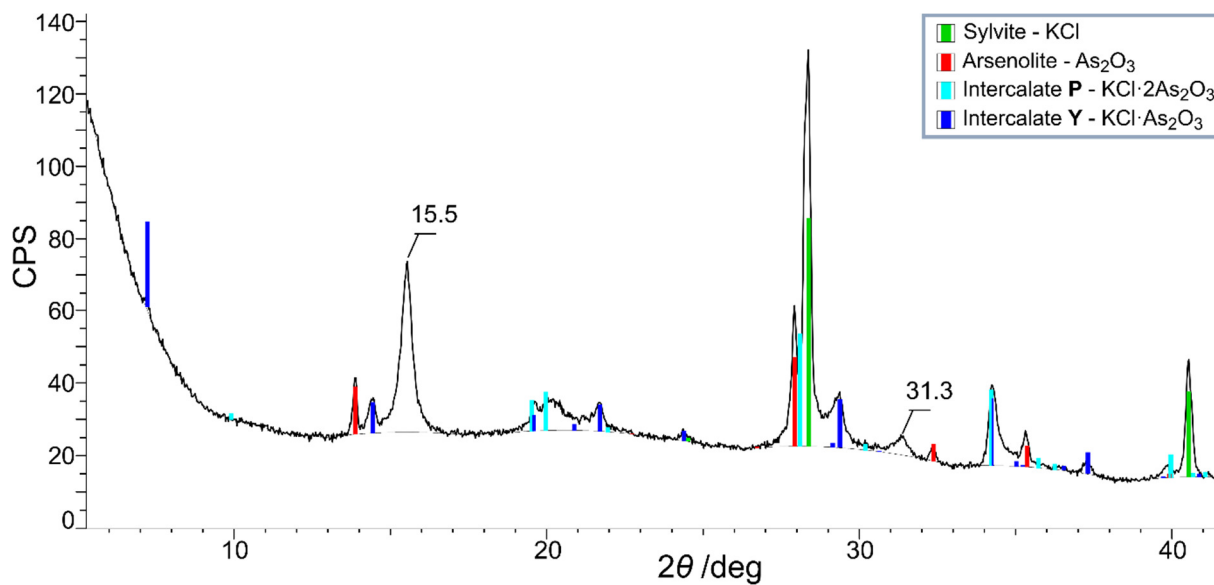

**Figure S4.** Powder X-ray diffraction pattern of showing the reflection of the unknown phase  $\text{Z}_{\text{KCl}}$  (at 15.5° and 31.3°) in addition to reflections of other compounds present in the reaction mixture.

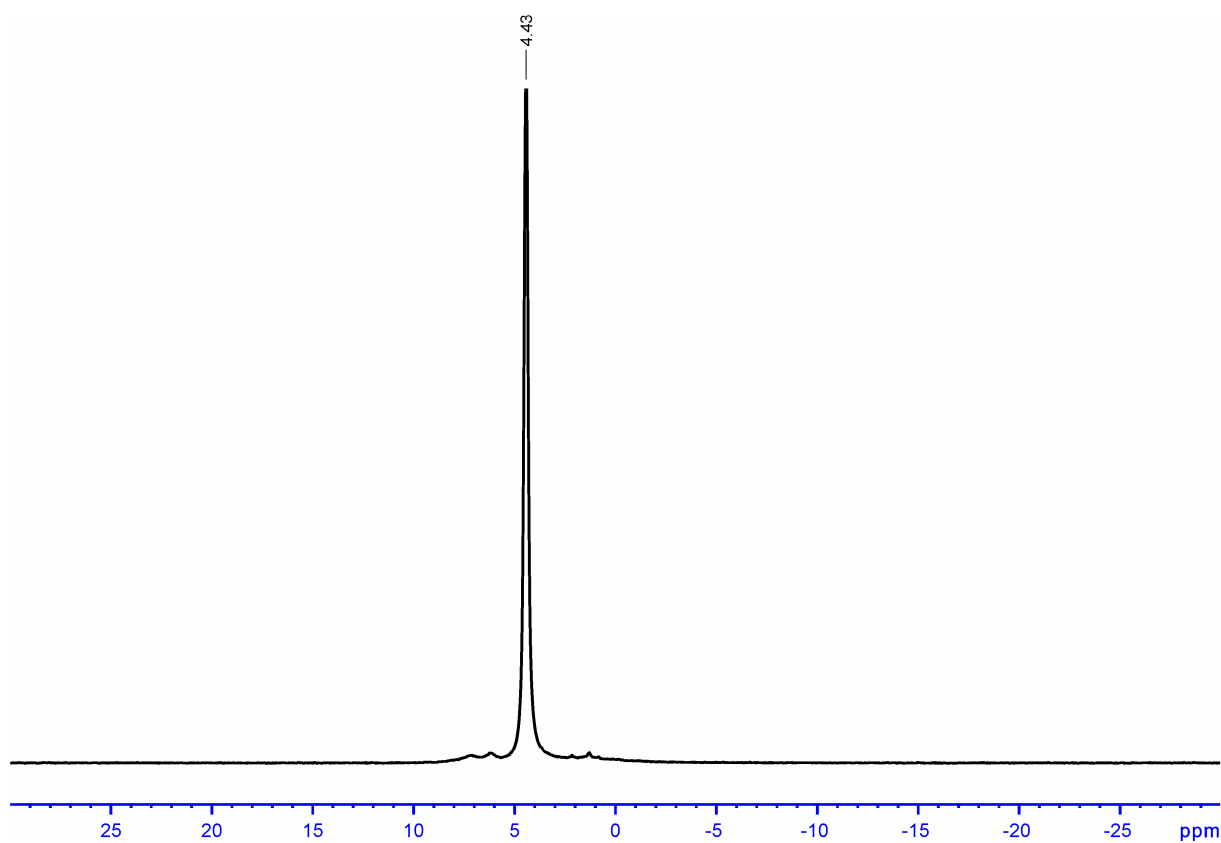

**Figure S5.** Solid-state  $^1\text{H}$ -NMR (600.15 MHz) spectrum of intercalate  $\text{Y}_{\text{KCl}}$  recorded with the spin-echo technique at 55.555 kHz spinning speed.
